# Supplementary material
Source: publisher figshare collection journal article supplement (https://asha.figshare.com/articles/dataset/_/14642784)
Supplement: Supplementary file 1 [file 1]

**Supplemental Material S2.** Odds ratio of self-reported falls by hearing loss as measured by hearing handicap.

| <b>OR of self-reported falls by hearing loss</b> |                   |                     |                                           |
|--------------------------------------------------|-------------------|---------------------|-------------------------------------------|
| <b>Hearing Loss</b>                              | <b>Unadjusted</b> | <b>Age-Adjusted</b> | <b>Multivariable-Adjusted<sup>1</sup></b> |
| Handicap                                         |                   |                     |                                           |
| Good                                             | ref               | ref                 | ref                                       |
| Little trouble                                   | 2.35 (1.89, 2.94) | 2.02 (1.62, 2.51)   | 1.96 (1.56, 2.47)                         |
| Lot of trouble/Deaf                              | 3.18 (2.45, 4.12) | 2.08 (1.56, 2.78)   | 1.81 (1.21, 2.72)                         |
| <i>p-value</i>                                   | < .0001           | < .0001             | < .0001                                   |
| <i>p-trend</i>                                   | < .0001           | < .0001             | < .0001                                   |

<sup>1</sup>Age (continuous), race/ethnicity (categorical), education (categorical), gender (categorical), vision (categorical), diabetes (categorical), smoking (categorical), hypertension (categorical), stroke (categorical), and hearing aid use (categorical)
