# Supplementary material
Source: publisher figshare collection journal article supplement (https://asha.figshare.com/articles/dataset/_/14642784)
Supplement: Supplementary file 2 [file 1]

## Supplemental Material S1. NHANES variables used to define measures of interest.

| Analysis Measure              | NHANES Variable | NHANES Question Text/Definition                                                                                                                                       |
|-------------------------------|-----------------|-----------------------------------------------------------------------------------------------------------------------------------------------------------------------|
| Hearing Impairment            | AUQ130          | Which statement best describes your hearing (without hearing aid)? Would you say your hearing is good, that you have a little trouble, a lot of trouble, or you deaf? |
| Hearing Aid Use               | AUQ150          | Have you ever worn a hearing aid?                                                                                                                                     |
|                               | AUQ180          | In the past 12 months, how often would you say you wore a hearing aid?                                                                                                |
| Falls                         | BAQ010          | During the past 12 months, have you had dizziness, difficulty with balance or difficulty with falling?                                                                |
|                               | BAQ020C         | Which of these problems have you had...difficulty with falling?                                                                                                       |
| Age                           | RIDAGEYR        | Best age in years of the sample person at time of HH screening. Individuals 85 and over are top coded at 85 years of age.                                             |
| Gender                        | RIAGENDR        | Gender of the sample person                                                                                                                                           |
| Education                     | DMDDEDUC2       | What is the highest grade or level of school you have completed or the highest degree you have received?                                                              |
| Race/Ethnicity                | RIDRETH1        | Recode of reported race and ethnicity information.                                                                                                                    |
|                               | RIDRETH2        | Linked NH3 Race and Ethnicity Recode.                                                                                                                                 |
| Vision                        | VIQ010          | With both eyes open, can you see light?                                                                                                                               |
|                               | VIQ030          | At the present time, would you say your eyesight, with glasses or contact lenses if you wear them, is                                                                 |
| Diabetes                      | DIQ010          | {Other than during pregnancy}, have you ever been told by a doctor or health professional that you have diabetes or sugar diabetes?                                   |
| Smoker                        | SMQ020          | Have you smoked at least 100 cigarettes in your entire life?                                                                                                          |
|                               | SMQ040          | Do you now smoke cigarettes                                                                                                                                           |
| Hypertension                  | BPQ020          | Have you ever been told by a doctor or other health professional that you had hypertension, also called high blood pressure?                                          |
|                               | BPQ030          | Were you told on 2 or more different visits that you had hypertension, also called high blood pressure?                                                               |
| Stroke                        | MCQ160F         | Has a doctor or other health professional ever told you that you . . .had a stroke?                                                                                   |
| Pure Tone Average (right ear) | AUXU500R        | Right threshold @ 500Hz in decibels (Hearing Level)                                                                                                                   |
|                               | AUXU1K1R        | Right threshold @ 1000Hz in decibels (Hearing Level)                                                                                                                  |
|                               | AUXU2KR         | Right threshold @ 2000Hz in decibels (Hearing Level)                                                                                                                  |
|                               | AUXU4KR         | Right threshold @ 4000Hz in decibels (Hearing Level)                                                                                                                  |
| Pure Tone Average (left ear)  | AUXU500L        | Left threshold @ 500Hz in decibels (Hearing Level)                                                                                                                    |
|                               | AUXU1K1L        | Left threshold @ 1000Hz in decibels (Hearing Level)                                                                                                                   |
|                               | AUXU2KL         | Left threshold @ 2000Hz in decibels (Hearing Level)                                                                                                                   |
|                               | AUXU4KL         | Left threshold @ 4000Hz in decibels (Hearing Level)                                                                                                                   |
